# Supplementary material for: Biosynthesis, Characterization, and Augmented Anticancer Activity of ZrO2 Doped ZnO/rGO Nanocomposite
Source: MDPI journal article supplement (doi:10.3390/jfb14010038), 2023-01-09
Supplement: s1 [file s1]

## Supplementary Information

### **Biosynthesis, characterization, and augmented anticancer activity of ZrO<sub>2</sub> doped ZnO/rGO nanocomposite.**

Maqusood Ahamed<sup>1</sup> \*, Rashid Lateef<sup>2</sup>, M.A. Majeed Khan<sup>1</sup>, Pavan Rajanahalli<sup>3</sup>, Mohd Javed Akhtar<sup>1</sup>

<sup>1</sup>King Abdullah Institute for Nanotechnology, King Saud University, Riyadh 11451, Saudi Arabia

<sup>2</sup>Department of Biochemistry, Faculty of Science, Veer Bahadur Singh Purvanchal University, Jaunpur 222003, Uttar Pradesh, India

<sup>3</sup>Department of Biology, University of Tampa, Tampa, FL 33569, USA

\*Correspondence: mahamed@ksu.edu.sa (Maqusood Ahamed)

.....

#### ***Endpoint chromogenic limulus amebocyte lysate (LAL) assay***

The endpoint chromogenic limulus amebocyte lysate (LAL) assay kit (Lonza, Basel, Switzerland) was used to examine endotoxin contamination in ZnO NPs, ZnO/ZrO<sub>2</sub> NCs, and ZnO/ZrO<sub>2</sub>/rGO NCs. This assay has a sensitivity range of 0.1 EU/ml - 1.0 EU/ml. Briefly, ZnO NPs, ZnO/ZrO<sub>2</sub> NCs, and ZnO/ZrO<sub>2</sub>/rGO NCs at a concentration of 50 µg/ml were mixed with the LAL supplied in the test kit and incubated at 37 °C for 10 min. A peptide substrate solution was then mixed with the LAL-sample mixture and incubated at 37 °C for next 6 min. The reaction was then stopped by addition of stop reagent supplied with the kit. In addition to the complete reaction mixture (i.e. NPs/NCs+LAL+substrate), two additional mixtures were prepared to check the possible interference of NPs/NCs in the assay, namely NPs/NCs+LAL and BT NPs+substrate. If endotoxin is present in the sample, a yellow color should develop only in the complete reaction mixture, not in other two mixtures. The absorbance of the enzymatically cleaved p-nitroaniline part of the substrate

peptide was measured at 405 nm in a microplate reader (Synergy-HT, BioTek, Vinnoski, VT, USA). Since this absorbance is in direct proportion to the amount of endotoxin present, the concentration of endotoxin can be calculated from a standard curve using LPS.

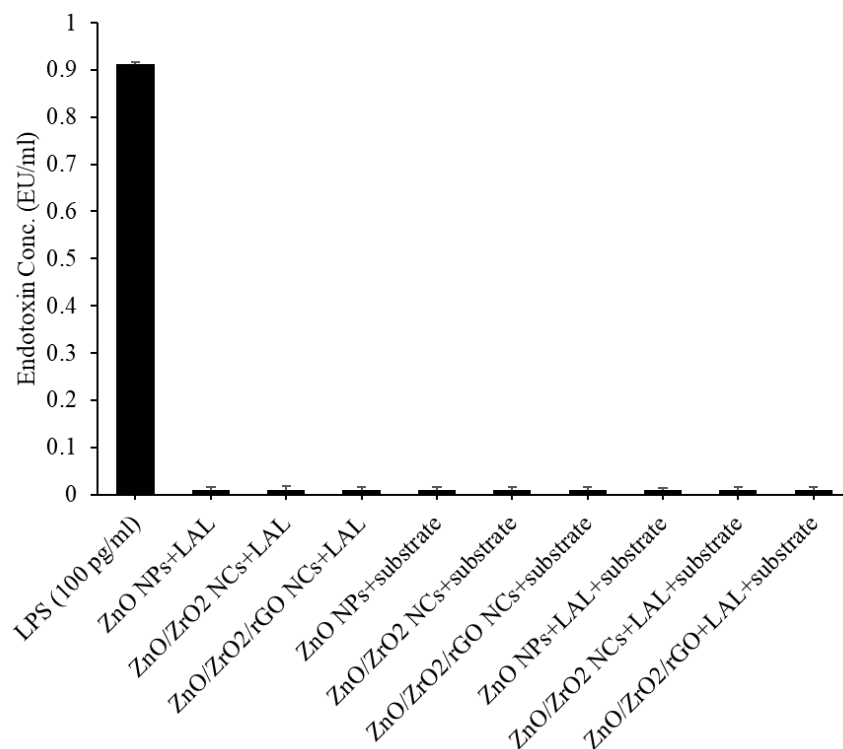

**Figure S1. Endpoint chromogenic limulus amebocyte lysate (LAL) assay for endotoxin detection in prepared ZnO NPs, ZnO/ZrO<sub>2</sub> NCs, and ZnO/ZrO<sub>2</sub>/rGO NCs.** A concentration of 50 µg/ml of ZnO NPs, ZnO/ZrO<sub>2</sub> NCs, and ZnO/ZrO<sub>2</sub>/rGO NCs were incubated with LAL (containing enzyme), or substrate, or both (LAL+substrate). After the completion of incubation time, absorbance of the substrate was measured at 405 nm. If endotoxin is present in the sample, a yellow color should develop only in the complete reaction mixture (NPs/NCs+LAL+substrate), not in other two mixtures. The absorbance of the enzymatically cleaved p-nitroaniline part of the substrate peptide was measured at 405 nm by a microplate reader (Synergy-HT).

Results showed that there is no endotoxin contamination in synthesized ZnO NPs, ZnO/ZrO<sub>2</sub> NCs, and ZnO/ZrO<sub>2</sub>/rGO NCs.

## Hydrodynamic size and zeta potential examination

Hydrodynamic size and zeta potential of green prepared ZnO NPs, ZnO/ZrO<sub>2</sub> NCs, and ZnO/ZrO<sub>2</sub>/rGO NCs was examined in culture media (DMEM) (Figure S2).

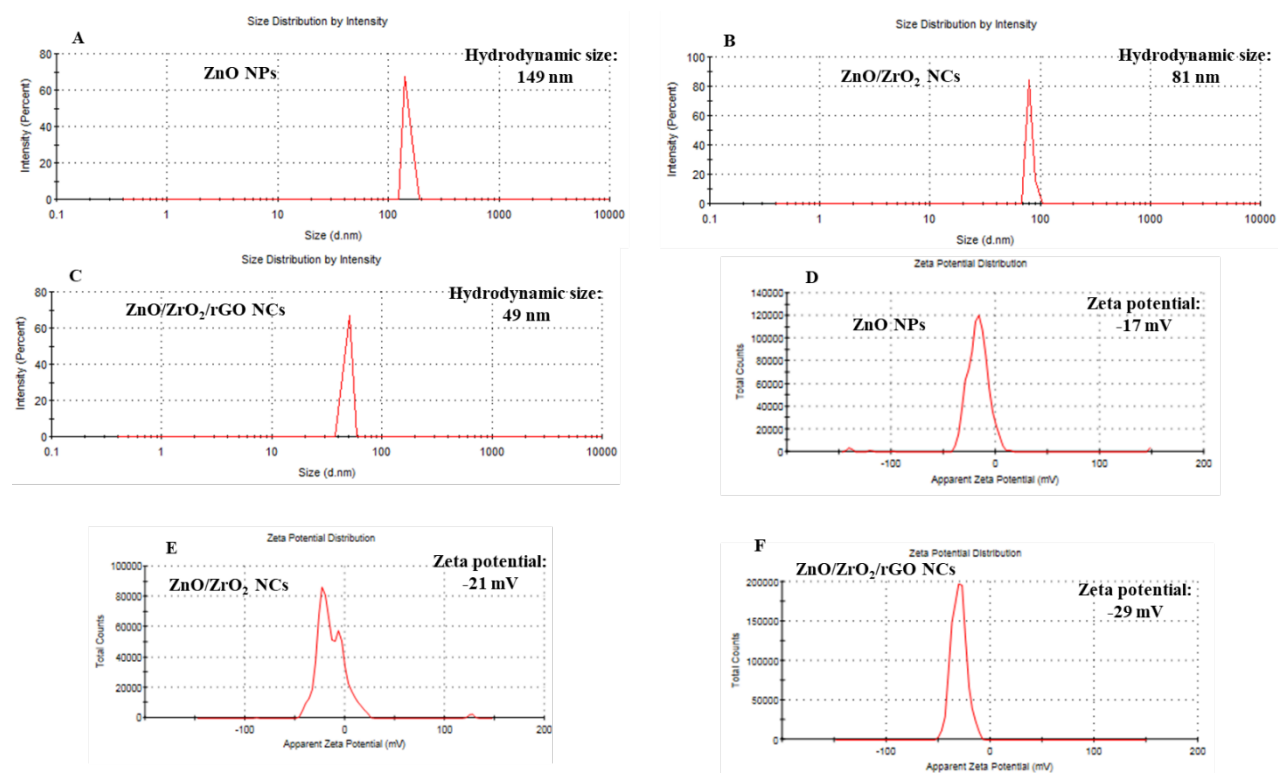

**Figure S2.** DLS characterization of green prepared ZnO NPs, ZnO/ZrO<sub>2</sub> NCs, and ZnO/ZrO<sub>2</sub>/rGO NCs. (A-C) Hydrodynamic size of ZnO NPs, ZnO/ZrO<sub>2</sub> NCs, and ZnO/ZrO<sub>2</sub>/rGO NCs. (D-F) Zeta potential ZnO NPs, ZnO/ZrO<sub>2</sub> NCs, and ZnO/ZrO<sub>2</sub>/rGO NCs.
